# Supplementary material for: Prediabetes risk classification algorithm via carotid bodies and K-means clustering technique
Source: PeerJ Comput Sci. 2025 Jan 20;11:e2516. doi: 10.7717/peerj-cs.2516 (PMC11784710; doi:10.7717/peerj-cs.2516)
Supplement: Supplemental Information 1 — Time series of heart rate (HR), respiratory rate (RR), peripheral oxygen saturation (SpO2) and glucose. These are anonymised data from 25 control volunteers and 8 prediabetic/diabetic volunteers. [file peerj-cs-11-2516-s001.xlsx]

## Sheet: pre-diabetic-diabetic
	Time (min)	HR	RR	SpO2	Glucose
20180101001	1	59	6	95.17	105
	2	59	8	95.62
	3	57	15	93.98
	4	55	11	94.95
	5	58	13	94.76	97
	6	58	18	94.82
	7	56	16	94.32
	8	62	15	94.29
	9	62	17	97.63
	10	54	14	95.78	94
	11	58	13	97.02	94
	12	58	17	94.88	93
	13	62	12	94.84	92
	14	60	17	96.32	92
	15	58	16	96	92
	16	57	17	94.5	92
	17	59	16	94.19	92
	18	58	16	95.22	92
	19	60	14	95.04	92
	20				92
	21
	22
	23
	24
	25				92
	26
	27
	28
	29
	30	58	16	86.18	92
	31	58	15	88.95
	32	57	17	87.96	89
	33	59	16	89.35
	34	59	17	90.96	89
	35	58	15	90.8
	36	59	18	93.92	87
	37	60	15	92.06
	38	59	15	93.75	86
	39	62	13	92.37
	40	62	15	91.59	85
	41	66	15	93.37
	42	60	15	91.7	85
	43	62	14	91.86
	44	64	14	92.92	86
	45	66	14	93.5
	46	64	16	91.59	86
	47	63	17	92.83
	48	63	15	93.1	87
	49	61	16	93.64
	50	61	15	92.86	89
	51	65	14	95.12
	52	62	16	93.06	92
	53	60	16	92.32
	54	63	14	91.4	96
	55	69	15	94.35
	56	65	14	92.04	101
	57	71	13	91.9
	58	64	17	93	105
	59	62	17	94.34
	60	61	16	94.52	108
	61	64	15	93.59
	62	62	15	93.19	115
	63	64	16	93.51
	64	64	15	92.97	120
	65	64	19	97.1
	66	64	15	93.22	125
	67	65	17	95.11
	68	65	18	92.72	127
	69	67	15	94.1
	70	65	16	93.06	131
	71	61	17	92.37
	72	61	16	93.23	132
	73	63	15	93.35
	74	61	15	92.06	135
	75	60	15	93.78
	76	62	17	92.78	139
	77	63	16	92.77
	78	59	15	92.67	143
	79	62	15	92.47
	80	60	17	92.65	146
	81	62	16	93.34
	82	62	15	93.9	149
	83	63	13	93.24
	84	61	16	93.97	153
	85	61	16	92.75
	86	66	17	92.2	155
	87	64	15	96.5
	88	62	16	98.06	158
	89	65	16	94.74
	90	65	16	98.61	161
	91	63	17	98.44
	92	66	16	94.98	162
	93	62	17	94.09
	94	65	14	93.79	164
	95	66	16	98.72
	96	63	18	96.6	165
	97	58	16	94.15
	98	64	16	93.18	168
	99	64	16	99.29
	100	63	15	94.08	168
	101	60	18	93.67
	102	64	17	94.25	167
	103	64	17	98.77
	104	64	17	99.41	167
	105	64	17	100.19
	Time (min)	HR	RR	SpO2	Glucose
20180101002	1	68	15	99.44	128
	2	67	19	86.2
	3	63	15	74
	4	67	14	85.8
	5	59	17	99.54	128
	6	66	20	93.56
	7	65	18	91.97
	8	67	19	91.03
	9	62	16	99.52
	10	74	16	93.24	125
	11	66	17	95.45	123
	12	66	15	89.89	123
	13	63	16	82.87	123
	14	63	16	85.91	123
	15	70	15	86.26	124
	16	63	18	83.81	125
	17	63	14	86.82	126
	18	64	19	86.12	127
	19	64	18	89.31	127
	20	64	17	81.39	128
	21
	22
	23
	24
	25				127
	26
	27
	28
	29
	30	72	19	104.5	125
	31	73	19	104.59
	32	72	18	89	125
	33	72	18	90.58
	34	72	19	95.79	125
	35	71	19	94.21
	36	65	17	99.16	125
	37	68	17	94.38
	38	68	19	94.88	125
	39	70	19	97.81
	40	68	17	101.15	125
	41	76	19	96.3
	42	65	15	91.01	125
	43	75	17	89.48
	44	71	16	94.94	127
	45	71	18	97.26
	46	71	18	89.01	128
	47	67	16	86.55
	48	66	18	90.79	129
	49	68	20	86.17
	50	68	17	91.31	131
	51	68	16	89.07
	52	70	18	86.58	133
	53	71	19	89.39
	54	74	15	99.09	136
	55	70	17	85.75
	56	71	18	85.39	138
	57	68	18	87.51
	58	70	16	86.45	139
	59	73	18	91.77
	60	72	18	87.89	144
	61	67	20	87.38
	62	69	17	89.03	150
	63	69	18	86.27
	64	66	17	90.22	154
	65	71	19	87.87
	66	72	18	87.07	156
	67	66	19	88.14
	68	69	19	85.84	158
	69	70	17	85.96
	70	72	17	88.53	161
	71	67	18	85.42
	72	75	18	86.76	163
	73	66	17	86.87
	74	70	18	83.95	167
	75	68	18	86.98
	76	67	18	89.28	172
	77	69	18	80.67
	78	63	17	88.19	175
	79	69	19	92.04
	80	71	17	86.14	179
	81	71	17	86.83
	82	73	17	86.45	184
	83	65	18	83.67
	84	69	18	85.94	188
	85	70	17	92.61
	86	70	16	88.23	192
	87	66	18	86.44
	88	64	17	88.8	197
	89	69	18	98.19
	90	70	17	92.7	204
	91	67	18	93.77
	92	69	20	91.21	209
	93	68	18	94.43
	94	66	19	85.82	215
	95	64	17	87.65
	96	68	17	82.5	220
	97	70	18	86.02
	98	67	17	86.57	224
	99	66	18	84.23
	100	65	19	88.75	227
	101	63	19	86.27
	102	64	19	84.97	230
	103	64	17	94.8
	104	65	19	85.57	233
	105	66	16	86.06
	106	65	18	87.96	238
	107	63	17	87.19
	108	67	18	89.57	243
	109	67	19	86.58
	110	68	17	87.52	246
	111	62	17	87.25
	112	65	17	84.57	249
	113	67	17	86.86
	114	63	20	85.49	249
	115	70	16	86.66
	116	71	18	89.22	250
	117	62	19	86.26
	118	65	19	89.62	255
	119	68	16	86.86
	120	68	19	85.6	256
	121	66	17	85.08
	122	66	17	85.71	257
	123	65	17	92.2
	124	65	17	88.9	257
	125	68	19	86.72
	126	64	18	94.84	258
	127	65	16	91.37
	128	64	19	87.05	259
	129	66	18	87.9
	Time (min)	HR	RR	SpO2	Glucose
20180101003	1	81	15	98.43	85
	2	80	16	98.65
	3	81	17	95.67
	4	81	17	96.57
	5	80	16	97.76	87
	6	84	18	96.66
	7	81	16	97.69
	8	82	17	96.59
	9	83	19	96.12
	10	84	16	93.27	88
	11	80	14	95.19	88
	12	82	16	95.13	88
	13	85	17	95.81	87
	14	82	16	95.15	86
	15	81	16	95.13	86
	16	82	16	94.95	85
	17	79	18	92.53	84
	18	84	13	96.29	83
	19	81	18	96.66	82
	20	79	19	94.15	82
	21
	22
	23
	24
	25				81
	26
	27
	28
	29
	30	84	15	93.68	86
	31	84	17	89.25
	32	84	14	93.39	84
	33	84	17	103.69
	34	82	17	96.47	79
	35	83	12	84.95
	36	84	16	82.55	76
	37	81	17	100.45
	38	83	18	79.78	78
	39	84	16	95.06
	40	83	16	95.16	81
	41	86	17	102.66
	42	86	16	102.36	87
	43	85	16	99.99
	44	87	19	100.48	91
	45	85	16	96.42
	46	85	14	104.12	97
	47	85	17	96.04
	48	84	17	89.01	103
	49	85	18	81.99
	50	86	16	78.61	109
	51	85	17	82.53
	52	87	20	83.71	121
	53	87	19	82.64
	54	89	19	82.21	129
	55	84	17	91.59
	56	84	16	80.53	135
	57	84	18	74.53
	58	84	16	88.58	140
	59	85	15	94.54
	60	84	17	96.73	145
	61	84	16	88.36
	62	85	16	84	151
	63	84	15	87.93
	64	84	17	90.12	157
	65	85	16	90.83
	66	83	16	92.52	165
	67	85	16	79.34
	68	85	17	82.26	170
	69	87	20	81.09
	70	89	16	78.51	174
	71	90	17	78.03
	72	88	16	82.87	176
	73	88	16	80.06
	74	83	16	91.23	175
	75	89	18	78.74
	76	88	16	83.24	175
	77	88	17	84.59
	78	90	18	85.07	178
	79	90	17	78.18
	80	88	16	86.51	176
	81	89	17	85.03
	82	90	16	98.7	175
	83	90	16	77.42
	84	92	14	100.55	175
	85	91	16	88.2
	86	91	15	98.22	177
	87	89	19	73.72
	88	91	17	78.83	179
	89	90	18	83.18
	90	90	16	75.82	180
	91	88	16	94.77
	92	90	16	79.15	182
	93	90	15	86.61
	94	93	17	85.95	183
	95	89	15	67.92
	96	91	17	83.06	184
	97	86	15	76.35
	98	92	16	76.71	184
	99	90	17	81
	Time (min)	HR	RR	SpO2	Glucose
20180101004	1	80	17	90.04	65
	2	75	18	89.37
	3	78	17	77.32
	4	82	17	91.44
	5	76	19	85.96	68
	6	80	8	88.7
	7	82	15	82.36
	8	76	14	88.59
	9	77	17	91.44
	10	77	17	91.62	68
	11	75	15	90.87	68
	12	75	19	89.89	68
	13	76	17	94.95	66
	14	78	16	98.52	65
	15	76	19	95.18	64
	16	77	16	95.98	63
	17	74	18	98.23	62
	18	72	19	91.1	62
	19	74	18	96.65	61
	20	73	18	98.64	61
	21
	22
	23
	24
	25				57
	26
	27
	28
	29
	30	76	18	97.14	54
	31	74	17	98.64
	32	79	17	92.54	54
	33	78	19	100.75
	34	78	16	95.52	54
	35	78	18	90.62
	36	79	19	95.64	53
	37	78	16	96.2
	38	78	16	92.88	54
	39	78	18	97.68
	40	80	18	89.98	54
	41	80	17	86.42
	42	81	19	85.99	55
	43	79	19	93.33
	44	82	18	90.1	60
	45	82	17	89.44
	46	79	20	89.6	63
	47	84	17	90.78
	48	82	17	90.53	71
	49	77	20	94.45
	50	84	18	86.65	76
	51	86	19	90.47
	52	82	19	75.89	81
	53	80	18	87.5
	54	83	18	85.17	98
	55	82	19	96.63
	56	81	17	86.05	107
	57	84	18	83.76
	58	86	18	87.75	116
	59	84	17	88.69
	60	84	16	85.38	125
	61	84	17	89.56
	62	80	18	82.11	131
	63	85	17	87.69
	64	84	18	80.83	139
	65	80	19	78.46
	66	83	19	83.47	145
	67
	68				158
	69	81	20	89.99
	70	81	17	78.49	164
	71	77	21	83.98
	72	81	19	99.61	171
	73	82	18	83.86
	74	79	18	77.18	180
	75	80	18	79.47
	76	83	19	81.74	190
	77	81	20	81.46
	78	81	19	83.84	196
	79	79	19	84.98
	80	79	19	80.81	195
	81	79	18	86.12
	82	81	19	88.54	197
	83	81	17	87.84
	84	82	19	82.58	193
	85	81	18	83.14
	86	80	18	73.01	186
	87	78	17	84.17
	88	82	17	83.47	183
	89	82	18	80.69
	90	81	20	77.49	180
	Time (min)	HR	RR	SpO2	Glucose
20180101005	1	56	16	96.21	76
	2	53	17	93.39
	3	55	17	93.89
	4	53	18	95.29
	5	52	17	96.92	75
	6	54	18	94.39
	7	55	19	95.54
	8	54	17	96.06
	9	52	20	96.28
	10	54	18	96.14	77
	11	56	18	96.46	78
	12	54	17	95.78	77
	13	56	17	93.95	77
	14	54	18	96.23	77
	15	57	18	95.42	76
	16	52	17	96.18	76
	17	53	16	96.3	75
	18	54	18	92.44	75
	19	52	16	94.56	74
	20	59	19	96.07	74
	21
	22
	23
	24
	25				73
	26
	27
	28
	29
	30	54	18	95.74	73
	31	55	20	94.83
	32	54	17	95.37	72
	33	55	15	95.43
	34	55	18	96.4	70
	35	54	18	96.31
	36	56	18	97.6	70
	37	57	18	83.18
	38	53	17	97.81	70
	39	54	18	96.35
	40	58	18	96.15	70
	41	55	17	94.68
	42	55	19	95.48	70
	43	53	18	97.05
	44	56	17	95.63	70
	45	55	17	85.84
	46	53	18	98.22	71
	47	55	19	95.91
	48	56	17	97.92	70
	49	56	17	95.61
	50	54	16	97.6	70
	51	57	17	77.34
	52	55	16	97.48	70
	53	55	17	96.27
	54	55	16	96.81	70
	55	56	19	95.79
	56	55	17	96.68	71
	57	57	18	86.62
	58	55	18	75.14	71
	59	56	19	97.3
	60	57	18	95.8	71
	61	59	17	97.4
	62	58	19	96.38	72
	63	55	16	95.49
	64	56	16	85.58	72
	65	55	17	96.28
	66	56	20	94.69	74
	67	57	17	94.35
	68	56	18	96.53	76
	69	56	20	94.81
	70	58	15	93.87	78
	71	58	18	94.23
	72	57	17	92.67	80
	73	58	16	68.43
	74	55	15	93.92	82
	75	58	17	76.93
	76	58	19	78.62	84
	77	61	17	93.35
	78	57	18	78.09	86
	79	57	19	93.27
	80	57	19	72.17	90
	81	57	17	82.71
	82	57	18	93.59	93
	83	57	16	81.74
	84	60	18	91.99	96
	85	56	17	94.95
	86	57	18	91.55	98
	87	59	19	95.97
	88	56	18	94.95	100
	89	57	16	87.51
	90	59	17	91.41	101
	91	58	18	94.63
	92	57	19	40.46	102
	93	58	17	90.53
	94	56	19	94.58	103
	95	58	18	88.7
	96	58	18	76.89	105
	97	57	20	96.15
	98	58	18	82.37	107
	99
	100				107
	Time (min)	HR	RR	SpO2	Glucose
20180101006	1	61	18	88.46	85
	2	60	16	84.04
	3	60	18	92.6
	4	59	17	93.07
	5	62	17	87.73	79
	6	61	19	94.17
	7	60	19	85.36
	8	68	16	82.61
	9	72	20	78.82
	10	66	17	84.34	75
	11	69	18	92.17	74
	12	63	19	86.74	74
	13	62	16	85.72	73
	14	61	16	92.31	72
	15	59	19	94.34	71
	16	60	19	76.02	71
	17	62	18	93.7	70
	18	62	18	93.01	70
	19	71	19	93.64	70
	20	68	17	88.54	70
	21
	22
	23
	24
	25				69
	26
	27
	28
	29
	30	72	18	71.67	68
	31	82	19	70.09
	32	78	18	65.46	69
	33	81	18	89.41
	34	74	18	97.79	70
	35	76	17	83.04
	36	75	17	88.25	70
	37	76	17	80.83
	38	77	19	79.49	70
	39	76	18	92.7
	40	80	18	93.18	69
	41	76	17	83.11
	42	80	17	96.85	70
	43	78	18	81.37
	44	79	20	71.85	71
	45	85	19	85.8
	46	78	18	80.5	73
	47	80	19	93.98
	48	76	18	76.37	75
	49	71	18	94.15
	50	82	17	74.98	79
	51	80	16	75.04
	52	82	18	80.51	82
	53	83	17	77.2
	54	83	18	65.4	85
	55	81	18	73.39
	56	75	17	91.11	87
	57	85	18	75.64
	58	81	16	67.3	89
	59	72	17	82.14
	60	67	17	92.79	91
	61	69	21	90.64
	62	66	19	91.02	93
	63	67	22	78.5
	64	76	17	74.38	95
	65	80	16	71.25
	66	83	18	69.09	96
	67	89	18	67.48
	68	82	18	93.66	98
	69	84	18	85.64
	70	82	18	81.88	100
	71	84	17	95.87
	72	85	18	99.53	102
	73	88	18	64.41
	74	76	16	70.29	103
	75	78	17	87.02
	76	82	18	67.35	103
	77	86	17	77.3
	78	85	17	88.22	103
	79	79	17	82.81
	80	84	17	68.09	104
	81	90	17	74.16
	82	85	17	76.79	103
	83	90	19	75.43
	84	91	16	77	102
	85	91	18	68.58
	86	84	18	65.28	102
	87	86	17	73.08
	88	87	18	78.17	103
	89	86	17	69.99
	90	87	17	71.19	104
	91	76	20	66.98
	92	77	19	93.31	104
	93
	94				103
	Time (min)	HR	RR	SpO2	Glucose
20180101007	1	61	15	94.08	81
	2	60	12	92.96
	3	66	12	94.06
	4	63	18	68.21
	5	64	20	81.13	82
	6	66	16	79.25
	7	64	14	95.28
	8	73	15	93.23
	9	73	15	93.16
	10	71	17	94.45	85
	11	73	16	94.69	85
	12	69	17	94.85	86
	13	67	15	93.01	87
	14	67	19	94.05	89
	15	66	18	89.62	89
	16	61	18	92.67	87
	17	71	18	96.96	86
	18	64	18	90.59	85
	19	63	13	85.78	84
	20	61	15	91.2	83
	21
	22
	23
	24
	25				83
	26
	27
	28
	29
	30	62	19	94.88	84
	31	64	17	94.12
	32	72	18	89.75	85
	33	62	16	92.26
	34	62	18	95.41	85
	35	61	20	95.14
	36	62	15	95.1	86
	37	62	20	97.65
	38	61	16	90.58	86
	39	65	18	91.17
	40	63	15	91.06	87
	41	62	18	91.49
	42	63	18	94.52	87
	43	66	18	94.57
	44	64	17	90.39	89
	45	65	17	95.66
	46	64	16	100.9	90
	47	64	16	81
	48	63	17	94.37	92
	49	63	15	93.71
	50	66	15	93.1	95
	51	66	17	92.66
	52	66	19	95.74	98
	53	65	17	90.97
	54	64	18	92.49	103
	55	66	18	93.24
	56	66	16	94.51	108
	57	63	18	84.75
	58	67	17	94.43	113
	59	71	18	90.37
	60	65	17	82.37	119
	61	65	16	94.3
	62	66	16	88.9	122
	63	67	19	94.77
	64	66	16	85.65	125
	65	65	14	91.82
	66	66	16	91.7	128
	67	68	20	88.73
	68	67	17	94.32	133
	69	69	17	94.34
	70	64	20	93.95	134
	71	68	19	91.7
	72	65	19	92.75	137
	73	67	18	92
	74	67	17	90.41	140
	75	65	18	91.8
	76	69	16	92.1	143
	77	66	18	92.75
	78	66	17	93.55	146
	79	65	17	92.06
	80	66	17	86.74	147
	81	66	17	88.91
	82	66	16	90.05	153
	83	63	18	84.24
	84	63	17	89.87	158
	85	63	17	102.62
	86	65	18	90.18	161
	87	64	17	78.02
	88	63	17	93.92	165
	89	63	17	89.92
	90	64	16	87.97	168
	91	64	18	84.55
	92	65	18	86.07	170
	93	66	17	90.83
	94	62	18	82.16	171
	95	66	19	84.46
	96	68	18	102.52	172
	97	65	15	59.35
	98	65	18	100.78	175
	99	66	17	88.03
	100	60	18	84.58	175
	101	62	16	94.25
	102	62	17	89.36	177
	103	65	16	90.69
	104	62	16	83.24	177
	105	64	18	90.38
	106	64	17	92.77	178
	107	62	18	89.54
	108	62	17	92.57	178
	109	64	16	92.59
	110	62	18	92.57	180
	111	63	15	93.76
	112	63	16	94.19	184
	113	63	15	95.5
	114	63	14	97.19	186
	115	64	16	91.7
	116	64	17	88.54	187
	117	63	15	98.22
	118	62	14	96.1	188
	119	66	17	85.85
	120	64	15	100.48	189
	121	65	18	95.42
	122	64	16	97.32	189
	123	64	17	90.92
	124	63	16	85.71	190
	125	65	15	91.39
	126				190
	Time (min)	HR	RR	SpO2	Glucose
20180101008	1	63	18	97.79	126
	2	65	18	98.78
	3	62	17	97.7
	4	63	18	94.82
	5	64	18	97.52	123
	6	65	17	96.85
	7	66	19	89.49
	8	62	16	99.07
	9	67	17	81.86
	10	67	16	101.17	121
	11	65	18	97.05	120
	12	60	15	93.22	120
	13	64	17	94.45	120
	14	63	16	89.31	120
	15	67	20	102.4	120
	16	66	17	84.03	121
	17	66	18	79.25	121
	18	68	18	84.88	120
	19	66	18	95.75	120
	20	69	18	88.14	120
	21
	22
	23
	24
	25				124
	26
	27
	28
	29
	30	70	18	85.9	123
	31	67	17	85.87
	32	67	14	99.03	120
	33	69	17	89.23
	34	67	16	97.61	118
	35	67	18	82
	36	67	16	89.25	117
	37	70	17	100.71
	38	68	19	85.73	118
	39	67	17	94.7
	40	68	19	93.54	121
	41	68	17	99.66
	42	74	18	80.25	125
	43	74	16	84.38
	44	70	16	89.44	131
	45	69	19	88.64
	46	66	19	85.14	137
	47	69	19	77.85
	48	67	16	94.83	146
	49	69	19	76.52
	50	67	16	86.69	151
	51	69	19	83.62
	52	66	17	83.44	152
	53	67	19	84.92
	54	68	17	89.51	152
	55	68	16	80.35
	56	65	20	90.72	153
	57	69	16	86.62
	58	77	18	80.79	155
	59	69	18	85.86
	60	69	17	85.44	158
	61	68	19	83.82
	62	70	17	77.53	163
	63	70	18	89.78
	64	68	17	94.31	167
	65	67	18	92.39
	66	69	17	85.44	169
	67	70	18	NaN
	68	66	17	NaN	171
	69	66	18	NaN
	70	70	16	NaN	172
	71	80	17	NaN
	72	70	19	NaN	172
	73	66	19	NaN
	74	67	18	NaN	171
	75	66	17	NaN
	76	68	18	NaN	170
	77	65	17	NaN
	78	69	18	NaN	169
	79	69	18	NaN
	80	70	15	NaN	165
	81	69	17	NaN
	82	69	20	NaN	163
	83	69	19	NaN
	84	68	17	NaN	163
	85	69	16	NaN
	86	68	17	NaN	164
	87	70	19	NaN
	88	66	18	NaN	162
	89	70	18	NaN
	90				159

## Sheet: control
	Time (min)	HR	RR	SpO2	Glucose
20180102001	1	64	21	98	78
	2	58	20	99	78
	3	62	21	99	78
	4	64	21	99	77
	5	61	20	99	77
	6	67	22	99	77
	7	63	22	99	77
	8	64	21	99	77
	9	66	21	99	77
	10	66	22	99	76
	11	62	18	98	76
	12	58	19	100	77
	13	61	20	100	76
	14	63	19	99	76
	15	70	21	99	75
	16	67	21	99	74
	17	66	20	99	74
	18	66	21	99	74
	19	67	19	99	74
	20	65	21	99	74
	21				78
	22				77
	23				77
	24				76
	25				76
	26				76
	27				76
	28				76
	29				76
	30	69	20	97	75
	31	71	20	100
	32	70	19	100	75
	33	69	20	100
	34	71	21	100	75
	35	71	21	99
	36	73	19	100	77
	37	68	21	99
	38	74	18	99	79
	39	72	18	99
	40	73	19	99	81
	41	72	21	99
	42	71	19	99
	43	71	21	99
	44	73	21	99
	45	73	19	98	86
	46	79	19	98
	47	74	22	98
	48	74	20	99
	49	73	22	99
	50	72	22	99	90
	51	76	20	99
	52	73	21	99
	53	72	22	99
	54	76	20	99
	55	75	22	99	95
	56	70	19	99
	57	76	21	98
	58	73	22	98
	59	79	21	98
	60	76	22	99	101
	61	72	21	99
	62	73	22	99
	63	77	21	99
	64	77	22	99
	65	77	20	98	105
	66	78	22	99
	67	78	21	99
	68	76	23	99
	69	74	21	98
	70	77	22	99	107
	71	71	21	98
	72	78	20	98
	73	82	20	99
	74	75	22	99
	75	78	22	98	109
	76	77	23	98
	77	73	22	99
	78	72	20	99
	79	79	21	98
	80	73	22	98	108
	81	71	21	98
	82	76	21	98
	83	78	21	98
	84	77	22	98
	85	78	20	98	107
	86	78	22	98
	87	76	22	98
	88	77	22	98
	89	71	21	99
	90	75	18	99	103
	91
	92
	93
	94
	95				99
	96
	97
	98
	99
	100				97
	Time (min)	HR	RR	SpO2	Glucose
20180102002	1	81	18	97	71
	2	75	16	100	71
	3	82	16	100	71
	4	84	17	100	71
	5	80	15	100	70
	6	79	15	99	69
	7	85	17	100	69
	8	83	16	100	68
	9	84	18	96	68
	10	86	21	98	68
	11	74	16	99	68
	12	78	15	100	68
	13	83	18	100	68
	14	82	17	100	67
	15	79	17	100	67
	16	82	20	100	67
	17	84	20	100	68
	18	80	19	100	68
	19	83	18	100	69
	20	82	19	100	69
	21				69
	22				69
	23				69
	24				69
	25				70
	26				70
	27				69
	28				69
	29				69
	30	89	18	98	69
	31	87	17	98
	32	90	18	100	74
	33	91	20	99
	34	90	19	99	77
	35	92	19	99
	36	93	19	100	83
	37	93	20	99
	38	95	21	99	89
	39	95	22	99
	40	93	21	99	95
	41	91	21	99
	42	93	20	99
	43	96	19	100
	44	91	19	100
	45	94	21	100	112
	46	92	19	100
	47	92	19	100
	48	93	21	100
	49	95	20	100
	50	93	20	100	121
	51	91	21	100
	52	92	20	100
	53	92	20	100
	54	92	20	100
	55	93	20	99	125
	56	91	18	100
	57	95	21	100
	58	94	19	100
	59	95	20	100
	60	92	20	100	126
	61	90	20	99
	62	89	18	100
	63	88	17	100
	64	90	18	100
	65	90	17	100	124
	66	92	17	100
	67	92	17	100
	68	90	18	100
	69	92	19	100
	70	90	18	100	124
	71	89	17	100
	72	95	19	98
	73	90	18	100
	74	90	18	99
	75	92	19	100	119
	76	91	19	100
	77	88	17	99
	78	90	19	100
	79	89	20	100
	80	92	19	100	117
	81	88	17	100
	82	88	18	100
	83	88	20	100
	84	93	17	99
	85	97	21	100	117
	86	91	20	100
	87	92	19	100
	88			98
	89			99
	90			100	115
	Time (min)	HR	RR	SpO2	Glucose
20180102003	1	77	20	95	40
	2	72	18	93	40
	3	71	18	96	40
	4	77	17	96	40
	5	73	19	95	40
	6	76	18	94	40
	7	79	19	95	40
	8	77	21	94	40
	9	78	19	91	40
	10	74	20	96	40
	11	85	18	93	40
	12	71	19	94	40
	13	72	17	94	40
	14	77	22	97	40
	15	75	21	97	40
	16	75	22	95	40
	17	78	21	94	40
	18	75	22	93	40
	19	79	18	94	40
	20	76	22	94	40
	21				40
	22				40
	23				40
	24				40
	25				40
	26				40
	27				40
	28				40
	29				40
	30	84	19	91	40
	31	83	16	90
	32	80	19	90	40
	33	78	18	90
	34	78	20	89	40
	35	86	19	90
	36	82	20	89	40
	37	80	20	88
	38	84	20	88	40
	39	84	19	89
	40	87	18	89	40
	41	83	17	89
	42	87	18	89
	43	85	19	89
	44	88	19	90
	45	86	17	94	40
	46	83	17	95
	47	86	17	95
	48	89	18	95
	49	88	19	94
	50	83	16	93	40
	51	84	21	94
	52	89	20	94
	53	87	18	93
	54	84	18	93
	55	83	20	93	40
	56	89	18	95
	57	86	17	93
	58	88	17	94
	59	93	20	94
	60	86	18	92	40
	61	86	18	93
	62	89	17	94
	63	86	18	94
	64	86	17	94
	65	89	20	92	40
	66	91	17	94
	67	89	22	92
	68	89	18	92
	69	89	21	93
	70	83	21	93	40
	71	89	20	98
	72	88	22	94
	73	91	18	94
	74	93	19	93
	75	91	20	94	48
	76	92	21	93
	77	85	22	94
	78	90	19	95
	79	90	20	94
	80	88	19	95	59
	81	93	19	93
	82	89	20	93
	83	91	19	93
	84	91	20	93
	85	92	18	93	71
	86	90	20	92
	87	94	19	95
	88	93	19	94
	89	93	19	94
	90	92	20	94	78
	91
	92
	93
	94
	95				86
	96
	97
	98
	99
	100				88
	101
	102
	103
	104
	105				91
	106
	107
	108
	109
	110				93
	111
	112
	113
	114
	115				92
	Time (min)	HR	RR	SpO2	Glucose
20180102004	1	58	17	95	81
	2	57	15	95	81
	3	57	16	96	81
	4	58	16	96	80
	5	57	16	96	79
	6	58	16	96	77
	7	58	17	96	76
	8	58	16	96	76
	9	59	16	97	75
	10	57	17	96	74
	11	62	19	96	76
	12	57	16	98	77
	13	57	16	100	79
	14	56	17	98	82
	15	57	17	98	84
	16	57	17	99	86
	17	56	16	99	88
	18	59	16	100	88
	19	59	16	99	88
	20	55	18	99	87
	21			98	85
	22			98	84
	23			98	83
	24			99	86
	25			99	87
	26			99	89
	27			99	90
	28			99	90
	29			100	91
	30	57	16	99	91
	31	60	16	99
	32	56	16	100	89
	33	55	16	100
	34	55	15	98	87
	35	57	16	99
	36	56	15	99	86
	37	56	16	99
	38	57	17	98	82
	39	58	17	99
	40	56	14	99	81
	41	56	16	100
	42	57	14	100
	43	60	15	100
	44	59	17	100
	45	56	16	99	85
	46	57	15	100
	47	58	14	100
	48	57	16	100
	49	58	16	99
	50	62	16	99	92
	51	56	15	100
	52	56	17	98
	53	61	18	100
	54	60	16	100
	55	58	15	98	110
	56	58	17	98
	57	59	16	99
	58	59	17	98
	59	58	17	98
	60	58	16	99	119
	61	62	18	99
	62	58	16	99
	63	60	17	99
	64	60	17	99
	65	60	17	99	120
	66	58	17	100
	67	59	18	100
	68	61	18	100
	69	61	18	98
	70	61	18	100	123
	71	61	18	100
	72	63	19	99
	73	61	18	99
	74	62	18	100
	75	61	19	100	121
	76	62	19	100
	77	62	19	100
	78	61	19	100
	79	63	20	98
	80	62	20	100	118
	81	63	18	100
	82	67	18
	83	62	18
	84	63	19
	85	66	17		110
	86	62	19
	87	61	20
	88	59	19
	89	64	18
	90				105
	91
	92
	93
	94
	95				104
	Time (min)	HR	RR	SpO2	Glucose
20180102005	1	65	17	99	97
	2	61	17	99	97
	3	63	17	99	97
	4	61	17	99	97
	5	59	17	98	97
	6	64	18	98	97
	7	62	18	98	97
	8	60	16	99	97
	9	60	17	99	97
	10	60	17	99	98
	11	66	18	99	98
	12	61	17	99	98
	13	61	17	100	99
	14	64	19	99	99
	15	67	18	98	98
	16	61	17	99	98
	17	59	16	98	98
	18	65	17	97	98
	19	64	16	98	98
	20	62	18	98	98
	21				98
	22				98
	23				99
	24				99
	25				100
	26				100
	27				100
	28				100
	29				100
	30	62	17	97	99
	31	62	20	99
	32	58	19	98	97
	33	65	20	97
	34	62	19	98	97
	35	60	20	98
	36	65	20	98	97
	37	60	20	99
	38	73	20	99	98
	39	61	17	99
	40	68	18	97	99
	41	67	19	98
	42	62	16	98
	43	65	18	98
	44	63	19	98
	45	67	17	98	106
	46	68	17	98
	47	61	17	97
	48	63	16	97
	49	69	18	97
	50	64	19	97	117
	51	67	18	98
	52	67	18	97
	53	68	18	97
	54	68	18	98
	55	61	17	98	127
	56	63	18	97
	57	67	17	98
	58	66	17	98
	59	63	17	98
	60	66	19	98	131
	61	65	17	98
	62	66	18	98
	63	69	18	98
	64	62	16	98
	65	65	18	98	136
	66	66	16	98
	67	68	17	98
	68	65	19	98
	69	66	19	98
	70	67	17	98	136
	71	71	19	98
	72	71	20	98
	73	65	18	97
	74	63	19	98
	75	67	19	98	137
	76	68	17	98
	77	67	19	98
	78	64	17	98
	79	68	19	98
	80	73	17	97	136
	81	69	18	98
	82	67	17	98
	83	63	19	97
	84	63	18	98
	85	65	19	98	137
	86	68	18	98
	87	71	19	98
	88	75	18	99
	89	71	19	98
	90			98	135
	Time (min)	HR	RR	SpO2	Glucose
20180102006	1	71	17	95	98
	2	68	15	97
	3	73	16	99
	4	71	17	97
	5	74	17	98	97
	6	73	16	96
	7	71	17	99
	8	75	18	97
	9	72	16	97
	10	71	17	98	98
	11	71	19	98	98
	12	75	17	100	97
	13	74	16	98	97
	14	68	17	97	97
	15	75	15	96	96
	16	75	17	97	96
	17	74	15	97	97
	18	77	14	98	97
	19	76	15	98	97
	20	77	15	98	97
	21
	22
	23
	24
	25				98
	26
	27
	28
	29
	30	78	15	96	98
	31	76	19	100
	32	76	16	99	98
	33	75	17	99
	34	78	16	100	99
	35	78	18	99
	36	76	15	100	101
	37	75	16	100
	38	76	17	100	104
	39	75	15	100
	40	75	16	99	108
	41	76	16	100
	42	79	17	100	111
	43	75	17	96
	44	78	18	96	115
	45	76	16	96
	46	75	16	97	118
	47	74	15	98
	48	76	16	99	121
	49	75	16	98
	50	73	16	98	128
	51	79	16	98
	52	77	17	99	131
	53	79	17	98
	54	75	17	99	134
	55	73	14	99
	56	76	16	99	135
	57	72	15	98
	58	75	16	99	136
	59	73	16	99
	60	76	16	96	136
	61	81	17	98
	62	75	19	98	136
	63	76	18	97
	64	75	16	98	136
	65	77	16	98
	66	75	17	99	134
	67	70	16	98
	68	73	15	98	134
	69	73	16	98
	70	73	17	99	134
	71	74	17	98
	72	76	15	98	133
	73	76	16	97
	74	71	15	98	131
	75	74	15	99
	76	77	20	99	130
	77	74	16	98
	78	77	17	99	130
	79	76	17	99
	80	82	16	99	127
	81	83	16	99
	82	81	18	98	124
	83	79	16	98
	84	77	18	97	122
	85	78	16	99
	86	80	16	100	121
	87	77	17	99
	88	77	15	99	119
	89	79	16	99
	90	78	16	98	117
	91
	92				115
	93
	94				115
	Time (min)	HR	RR	SpO2	Glucose
20180102007	1	60	17	94	79
	2	63	17	94
	3	61	15	94
	4	61	16	96
	5	59	17	95	79
	6	63	18	96
	7	69	20	96
	8	64	14	95
	9	62	20	96
	10	62	17	96	79
	11	66	17	98	79
	12	62	18	97	79
	13	64	19	96	78
	14	61	17	96	78
	15	64	17	98	78
	16	60	18	97	78
	17	59	17	99	78
	18	58	18	99	78
	19	61	17	100	78
	20	59	18	100	78
	21
	22
	23
	24
	25				79
	26
	27
	28
	29
	30	69	16	97	76
	31	65	17	97
	32	66	18	98	76
	33	67	18	97
	34	65	18	97	77
	35	68	18	98
	36	67	16	97	78
	37	65	17	98
	38	66	18	96	82
	39	68	17	96
	40	67	18	98	86
	41	67	18	96
	42	67	19	95	90
	43	66	17	96
	44	68	17	98	95
	45	69	17	95
	46	74	17	97	100
	47	70	18	96
	48	73	17	96	104
	49	68	18	95
	50	65	20	95	116
	51	66	18	95
	52	66	18	95	120
	53	74	18	95
	54	67	18	98	124
	55	66	19	99
	56	77	19	96	126
	57	67	17	95
	58	66	19	96	127
	59	66	19	95
	60	72	17	94	127
	61	70	18	95
	62	70	16	95	126
	63	73	17	95
	64	78	18	96	127
	65	77	18	96
	66	76	19	96	125
	67	74	18	97
	68	76	19	95	124
	69	74	18	96
	70	74	18	94	121
	71	70	18	95
	72	72	16	95	118
	73	77	19	96
	74	74	19	95	116
	75	69	18	96
	76	68	16	97	118
	77	69	19	97
	78	74	18	96	123
	79	68	19	97
	80	72	19	96	119
	81	68	19	97
	82	70	18	98	113
	83	70	18	97
	84	73	17	96	108
	85	71	18	95
	86	69	17	96	105
	87	71	19	97
	88	72	17	96	104
	89	65	19	96
	90			97	107
	Time (min)	HR	RR	SpO2	Glucose
20180102008	1	82	20	94	88
	2	80	19	94
	3	83	19	95
	4	83	19	96
	5	85	17	96	87
	6	85	19	96
	7	82	18	96
	8	83	18	95
	9	86	17	95
	10	84	20	95	85
	11	82	18	98	85
	12	83	18	97	85
	13	83	18	96	84
	14	83	20	95	84
	15	88	18	95	84
	16	86	19	95	83
	17	86	19	95	83
	18	82	18	95	83
	19	87	18	96	83
	20	84	19	96	83
	21
	22
	23
	24
	25				87
	26
	27
	28
	29
	30	88	19	96	89
	31	91	19	96
	32	87	20	95	89
	33	87	20	95
	34	90	21	96	89
	35	90	19	96
	36	92	21	95	88
	37	90	18	95
	38	91	20	95	88
	39	89	17	96
	40	86	21	95	89
	41	86	17	97
	42	86	17	95	90
	43	89	19	95
	44	90	19	95	91
	45	87	19	95
	46	88	20	95	93
	47	86	19	95
	48	86	18	96	97
	49	87	20	95
	50	84	20	95	98
	51	84	20	95
	52	86	20	96	101
	53	88	20	95
	54	88	20	96	104
	55	81	20	95
	56	79	17	95	107
	57	76	19	96
	58	79	19	96	110
	59	88	19	95
	60	86	19	95	112
	61	84	19	96
	62	79	18	95	112
	63	80	20	95
	64	89	17	96	112
	65	91	20	96
	66	91	20	95	112
	67	89	19	95
	68	79	20	95	112
	69	86	20	95
	70	81	18	95	113
	71	85	20	95
	72	85	20	96	113
	73	82	18	96
	74	79	18	98	113
	75	85	19	95
	76	85	20	96	113
	77	85	18	95
	78	85	20	98	112
	79	88	20	95
	80	82	20	96	115
	81	81	19	96
	82	89	18	96	110
	83	87	19	96
	84	85	19	97	109
	85	85	19	96
	86	80	18	95	108
	87	79	19	95
	88	86	18	96	108
	89	85	20	95
	90			96	108
	Time (min)	HR	RR	SpO2	Glucose
20180102009	1	81	18	-82.6	80
	2	74	19	-311.36
	3	75	20	-217.87
	4	80	18	36.61
	5	81	18	56.11	78
	6	79	16	-209.25
	7	79	18	-448.51
	8	81	17	-148.02
	9	78	17	-418.67
	10	76	18	76.01	80
	11	75	17	-632.72	81
	12	75	19	-380.61	81
	13	76	19	-231.73	81
	14	74	16	-208.28	81
	15	78	16	-481.05	81
	16	78	18	96.83	81
	17	78	18	-188.46	84
	18	79	15	-60.39	86
	19	75	19	97.96	87
	20	75	17	51.82	87
	21
	22
	23
	24
	25				83
	26
	27
	28
	29
	30	76	19	-65.17	81
	31	77	20	-149.12
	32	82	18	-286.43	81
	33	80	17	-484.97
	34	81	17	-782.37	81
	35	80	17	-166.55
	36	79	16	-533.55	81
	37	79	15	65.19
	38	78	15	-53.68	81
	39	77	17	40.29
	40	78	17	-84.9	83
	41	80	16	-249.83
	42	81	15	-383.52	87
	43	77	17	-142.94
	44	75	15	-307.59	91
	45	78	16	61.26
	46	81	18	-483.61	95
	47	81	19	-582.35
	48	80	15	-213.85	100
	49	78	16	-247.83
	50	79	17	-354.18	109
	51	80	15	83.33
	52	79	17	-154.71	114
	53	79	15	-60.06
	54	77	16	-257.55	118
	55	79	15	99.46
	56	80	15	-100.44	120
	57	80	16	-16.29
	58	81	17	-160.75	126
	59	80	15	-153.74
	60	80	17	-260.17	130
	61	78	16	-77.84
	62	81	17	-232.66	132
	63	77	15	-455.67
	64	82	18	-354.87	132
	65	79	16	-183.85
	66	81	15	-48.95	131
	67	77	16	78.42
	68	79	17	100.14	128
	69	81	17	-269.15
	70	78	17	-184.74	128
	71	77	16	-421.23
	72	82	16	-615.12	123
	73	75	15	-443.41
	74	78	16	-886.57	120
	75	80	16	-579.36
	76	79	17	-310.63	115
	77	78	17	-323.48
	78	79	15	86.4	110
	79	81	15	85.62
	80	80	18	-207.22	106
	81	79	17	48.43
	82	78	15	35.76	103
	83	83	16	93.79
	84	77	16	91.63	100
	85	81	17	-404.87
	86	77	16	-104.19	93
	87	76	17	-463.38
	88	83	17	-345.62
	89	78	18	-63.94
	Time (min)	HR	RR	SpO2	Glucose
20180102010	1	68	18	95.3	97
	2	70	19	96.56
	3	71	17	96.87
	4	69	19	97.6
	5	71	19	96.8	98
	6	69	19	96.8
	7	73	17	95.93
	8	69	20	96.09
	9	71	20	96.9
	10	75	17	99.32	94
	11	67	15	98	90
	12	65	18	94.75	92
	13	66	16	97.25	95
	14	67	15	97.31	96
	15	69	19	96.99	95
	16	69	16	97.73	96
	17	72	17	96.74	96
	18	66	17	97.41	95
	19	69	16	96.76	95
	20	68	17	97.41	95
	21
	22
	23
	24
	25				91
	26
	27
	28
	29
	30	63	16	97.41	92
	31	66	17	99.56
	32	64	16	99.93	98
	33	62	16	100.01
	34	64	18	99.49	101
	35	67	18	83.03
	36	65	19	95.08	101
	37	69	19	97.82
	38	63	17	98.63	102
	39	63	16	98.17
	40	64	16	97.05	104
	41	71	18	98.65
	42	70	20	97.27	103
	43	68	19	96.75
	44	66	17	98.49	111
	45	69	16	97.57
	46	68	17	99.04	116
	47	67	16	99.45
	48	68	17	99.45	121
	49	66	16	99.22
	50	68	18	99.06	124
	51	67	17	99.58
	52	68	17	99.55	126
	53	70	18	99.88
	54	71	17	99.18	129
	55	65	15	97.83
	56	67	19	99.03	133
	57	69	17	97.73
	58	72	17	99.37	135
	59	72	18	99.36
	60	65	17	99.19	132
	61	65	17	99.37
	62	72	16	98.29	128
	63	68	18	99.28
	64	71	18	98.99	127
	65	65	17	99.22
	66	72	17	99.45	127
	67	73	16	97.15
	68	65	16	99.29	128
	69	65	16	99.17
	70	65	16	96.63	130
	71	64	17	99.63
	72	69	17	98.55	130
	73	68	17	99.47
	74	67	15	98.78	124
	75	69	17	99.64
	76	65	16	99.62	119
	77	71	16	99.29
	78	69	17	99.45	115
	79	68	15	98.56
	80	68	16	99.3	113
	81	73	16	99.63
	82	71	15	99.97	112
	83	73	16	99.81
	84	74	15	97.67	112
	85	76	19	99.91
	86	75	16	99.79	110
	87	73	14	99.79
	88	74	17	99	109
	89
	90				109
	Time (min)	HR	RR	SpO2	Glucose
20180102011	1	68	16	97.6	78
	2	67	16	97.14
	3	69	17	99
	4	69	16	96.95
	5	68	16	96.26	79
	6	70	17	98.39
	7	70	15	94.91
	8	71	16	97.51
	9	73	16	96.99
	10	69	17	97.5	80
	11	70	18	95.46	81
	12	76	19	98	80
	13	80	18	94.4	80
	14	74	17	97.67	81
	15	76	17	99.76	81
	16	71	16	97.5	80
	17	68	16	97.7	81
	18	70	17	97.5	81
	19	69	17	98.4	80
	20	70	16	98.17	80
	21
	22
	23
	24
	25				81
	26
	27
	28
	29
	30	85	18	97.69	81
	31	85	17	98.3
	32	81	17	98	85
	33	85	17	98.35
	34	74	15	96.28	90
	35	82	18	99.25
	36	83	19	98.02	98
	37	82	18	98.33
	38	81	16	97.54	108
	39	80	18	98.26
	40	81	18	98.01	123
	41	82	20	99.17
	42	77	18	99.38	134
	43	78	18	99.77
	44	75	17	98.57	143
	45	79	18	96.88
	46	79	17	100.39	148
	47	77	17	99.28
	48	74	17	98.84	152
	49	78	18	99.41
	50	75	17	99.23	159
	51	75	16	99.16
	52	76	19	98.78	158
	53	77	18	98.7
	54	73	16	98.86	164
	55	74	17	99.28
	56	73	17	97.94	165
	57	74	17	99.13
	58	79	18	83.77	163
	59	77	17	96.47
	60	80	15	97.56	161
	61	78	18	97.05
	62	77	16	97.2	158
	63	76	18	97.76
	64	81	16	98.24	150
	65	75	17	97.7
	66	79	15	96.9	154
	67	76	18	97.36
	68	69	15	96.81	140
	69	71	17	96.84
	70	76	16	96.45	134
	71	75	17	97.92
	72	78	18	98.02	134
	73	76	17	97.4
	74	72	17	97.58	134
	75	80	18	97.48
	76	76	18	97.56	134
	77	78	17	98.07
	78	82	17	98.32	134
	79	76	16	97.08
	80	81	18	98.09	132
	81	79	18	98.75
	82	81	18	98.05	131
	83	83	17	99.22
	84	77	17	98.17	123
	85	76	18	98.22
	86	79	18	97.71	117
	87	78	17	97.56
	88	78	17	98.78	116
	89	84	18	99.29
	90				116
	Time (min)	HR	RR	SpO2	Glucose
20180102012	1	75	18	93.49	88
	2	74	20	92.78
	3	74	19	90.32
	4	73	19	97.69
	5	73	17	96.34	88
	6	75	16	95.83
	7	74	18	96.76
	8	73	19	96.2
	9	72	19	94.82
	10	73	19	96.89	89
	11	76	18	96.28	89
	12	73	18	84.98	89
	13	72	18	99.34	89
	14	72	19	97.56	89
	15	74	18	97.49	89
	16	73	22	97.46	89
	17	73	18	97.71	89
	18	74	19	98.2	89
	19	73	19	98.24	89
	20	74	16	98.3	89
	21
	22
	23
	24
	25				88
	26
	27
	28
	29
	30	73	18	99.08	85
	31	75	18	99.05
	32	72	19	98.07	85
	33	72	20	98.53
	34	72	19	98.63	85
	35	70	18	98.45
	36	70	19	98.83	86
	37	71	18	98.83
	38	70	17	99.04	88
	39	69	18	99.33
	40	71	17	99.17	90
	41	71	18	99.1
	42	71	19	99.15	92
	43	69	18	98.12
	44	69	19	98.67	96
	45	68	19	98.3
	46	69	18	98.47	100
	47	70	18	98.62
	48	67	20	97.4	107
	49	70	18	99.21
	50	70	20	99.02	111
	51	68	19	98.71
	52	70	16	98.44	113
	53	66	19	99.03
	54	69	17	99.23	115
	55	68	18	99.34
	56	70	18	98.84	117
	57	68	18	99.02
	58	69	18	99.28	118
	59	70	18	99.16
	60	67	18	98.43	118
	61	66	19	98.79
	62	67	19	99.01	120
	63	66	19	99.42
	64	67	18	99.32	122
	65	70	19	99.73
	66	70	18	99.03	123
	67	67	19	99.48
	68	69	18	99.14	124
	69	70	17	99.42
	70	71	18	99.63	124
	71	66	19	99.42
	72	69	18	99.61	124
	73	69	18	99.55
	74	69	17	99.55	123
	75	69	18	99.34
	76	73	18	99.59	123
	77	69	20	99.4
	78	71	17	99.64	119
	79	70	19	99.67
	80	71	17	99.57	117
	81	70	17	99.68
	82	70	19	99.37	116
	83	71	19	99.54
	84	73	18	99.52	116
	85	73	16	99.81
	86	72	19	99.68	116
	87	69	19	99.63
	88	71	19	99.44	115
	89	71	21	99.54
	90				115
	Time (min)	HR	RR	SpO2	Glucose
20180102013	1	77	16	97.66	63
	2	79	17	95.98
	3	81	17	94.35
	4	82	17	96.08
	5	78	16	97.73	64
	6	78	18	95.44
	7	80	18	93.49
	8	77	18	96.02
	9	79	19	94.81
	10	81	20	95.05	64
	11	74	18	86.5	65
	12	74	17	92.17	65
	13	81	18	93.04	64
	14	81	18	91.62	63
	15	77	20	92.71	63
	16	79	20	84.6	63
	17	80	18	95.21	63
	18	77	18	87.87	63
	19	72	17	88.88	64
	20	74	16	93.31	65
	21
	22
	23
	24
	25				66
	26
	27
	28
	29
	30	78	19	99.48	66
	31	75	17	98.77
	32	75	17	99.75	69
	33	84	17	98.96
	34	82	17	100.07	69
	35	79	17	99.7
	36	78	16	98.91	72
	37	80	17	98.74
	38	77	16	99.52	74
	39	82	17	98.27
	40	77	17	98.71	77
	41	79	16	99.24
	42	82	18	98.19	79
	43	85	18	99.93
	44	87	17	100.13	83
	45	87	17	100.26
	46	80	17	99.66	88
	47	81	18	98.15
	48	80	19	99.63	97
	49	83	19	99.69
	50	82	18	99.99	100
	51	82	19	99.67
	52	83	18	99.2	104
	53	87	19	99.79
	54	83	19	99.76	107
	55	84	17	99.9
	56	85	18	99.68	111
	57	84	17	99.81
	58	85	16	98.46	117
	59	82	17	97.78
	60	82	18	98.38	125
	61	82	15	99.81
	62	87	18	99.41	128
	63	87	17	98.67
	64	87	20	99.51	129
	65	84	18	99.53
	66	84	18	99.45	128
	67	83	19	99.66
	68	84	20	99.85	123
	69	89	20	99.75
	70	85	20	99.44	117
	71	88	18	96.93
	72	85	18	100.17	116
	73	89	18	98.39
	74	93	18	99.88	110
	75	91	18	98.81
	76	85	18	99.35	110
	77	90	19	99.58
	78	91	17	98.76	109
	79	83	18	99.08
	80	87	18	98.46	107
	81	86	18	99.03
	82	87	17	99.13	105
	83	89	19	98.04
	84	92	17	98.2	104
	85	87	17	99.27
	86	89	18	98.38	102
	87	85	18	98.98
	88	82	17	98.18	96
	89	82	16	98.88
	90				91
	Time (min)	HR	RR	SpO2	Glucose
20180102014	1	73	15	99.27	58
	2	72	14	98.6
	3	72	18	99.12
	4	73	17	99.33
	5	74	17	99.39	57
	6	72	18	99.13
	7	73	17	98.29
	8	73	16	98.98
	9	72	15	97.69
	10	74	17	97.98	57
	11	69	17	97.94	56
	12	68	18	99.39	56
	13	70	16	101.11	56
	14	73	18	99.16	56
	15	71	16	98.22	57
	16	73	20	98.48	57
	17	75	18	98.15	56
	18	72	19	96.1	56
	19	74	17	97.95	57
	20	73	18	95.68	58
	21
	22
	23
	24
	25				58
	26
	27
	28
	29
	30	73	17	97.41	58
	31	72	16	98.26
	32	73	15	98.29	58
	33	73	14	98.55
	34	75	16	98.21	66
	35	76	15	98.03
	36	73	15	97.89	70
	37	75	15	98.15
	38	76	15	97.87	75
	39	76	16	97.6
	40	73	15	97.85	80
	41	76	15	98.62
	42	74	14	98.66	83
	43	75	16	97.29
	44	75	17	96.15	86
	45	76	20	96.21
	46	76	16	99.23	89
	47	76	16	97.63
	48	75	15	98.46	89
	49	77	15	98.25
	50	77	15	98.68	93
	51	75	16	98.43
	52	78	16	98.21	95
	53	77	14	98.5
	54	79	16	99.25	95
	55	78	17	97.71
	56	78	16	98.33	95
	57	80	15	98.27
	58	77	17	98.35	94
	59	80	15	97.31
	60	79	16	98.42	94
	61	77	17	99.47
	62	79	17	97.98	94
	63	76	16	99.11
	64	78	17	99.05	96
	65	77	16	99.38
	66	79	17	97.59	93
	67	81	16	96.59
	68	81	15	99.87	92
	69	78	16	98.89
	70	79	15	99.83	92
	71	80	14	99.46
	72	80	17	98.24	93
	73	79	17	96.73
	74	78	17	98.34	93
	75	79	17	99.75
	76	81	16	99.43	91
	77	80	18	97.39
	78	79	16	99.56	89
	79	80	15	99.69
	80	80	17	99.83	86
	81	80	16	100.55
	82	79	16	99.74	86
	83	80	17	99.74
	84	81	15	96.98	86
	85	80	15	98.98
	86	82	16	100.49	86
	87	82	16	100.12
	88	81	16	99.71	85
	89	82	17	100.23
	90				84
	Time (min)	HR	RR	SpO2	Glucose
20180102015	1	77	19	93.16	60
	2	77	18	93.09
	3	78	19	93.96
	4	76	19	95.56
	5	75	21	93.71	62
	6	74	18	93.94
	7	76	20	93.81
	8	75	20	94.12
	9	80	19	93.62
	10	78	19	94.01	63
	11	76	20	93.04	63
	12	78	18	96.18	63
	13	76	18	95.42	65
	14	78	19	94.88	65
	15	75	20	96.68	65
	16	75	20	97.81	65
	17	76	22	97.2	65
	18	75	19	91.69	65
	19	75	17	97.64	65
	20	74	20	97.99	65
	21
	22
	23
	24
	25				68
	26
	27
	28
	29
	30	76	20	97.12	67
	31	75	21	97.98
	32	75	20	99.59	65
	33	75	20	98.81
	34	76	20	99.51	65
	35	78	19	98.18
	36	77	20	99.04	65
	37	76	20	98.35
	38	74	20	98.9	66
	39	74	21	97.67
	40	76	21	97.38	68
	41	74	21	97.73
	42	74	19	99.59	71
	43	76	22	98.5
	44	76	21	90.84	77
	45	75	21	98.78
	46	76	18	98.82	81
	47	74	20	98.44
	48	77	19	98.79	86
	49	77	19	98.65
	50	77	19	98.47	86
	51	77	21	98.19
	52	76	21	98.04	89
	53	76	20	98.58
	54	74	19	98.96	91
	55	75	19	99.19
	56	78	18	99.22	99
	57	79	20	99.77
	58	79	18	99.59	103
	59	74	21	99.35
	60	76	19	99.65	105
	61	77	18	100.15
	62	77	17	98.99	108
	63	77	20	98.88
	64	76	17	99.58	110
	65	79	17	99.92
	66	78	17	100.66	111
	67	80	18	100.69
	68	81	16	99.74	115
	69	80	19	99.87
	70	81	20	100.42	115
	71	80	18	100.86
	72	78	17	99.29	115
	73	81	19	99.93
	74	81	18	100.76	115
	75	78	16	100.7
	76	81	19	97.39	115
	77	80	17	95.87
	78	77	16	97.67	115
	79	81	17	98.63
	80	79	19	99.47	115
	81	79	16	99.81
	82	80	18	98.13	115
	83	78	19	97.6
	84	80	17	101.67	114
	85	81	18	101.26
	86	79	20	100.16	110
	87	79	17	100.76
	88	80	20	100.99	109
	89
	90				107
	Time (min)	HR	RR	SpO2	Glucose
20180102016	1	71	20	95.17	79
	2	74	17	96.01
	3	75	18	94.85
	4	76	19	94.6
	5	73	19	95.23	81
	6	75	17	95.01
	7	76	16	95.21
	8	74	18	95.73
	9	78	18	95.94
	10	73	18	95.31	82
	11	70	19	94.94	82
	12	73	19	97.63	82
	13	72	19	95.77	82
	14	74	18	96.17	82
	15	73	18	96.36	82
	16	74	19	95.19	82
	17	75	20	95.34	82
	18	74	18	94.41	82
	19	76	18	94.62	83
	20	75	19	92.71	83
	21
	22
	23
	24
	25				83
	26
	27
	28
	29
	30	74	19	93.56	82
	31	73	16	90.02
	32	73	19	85.13	82
	33	76	19	89.07
	34	76	17	86.08	82
	35	78	18	94.3
	36	76	18	96.42	83
	37	78	18	90.4
	38	77	18	93.63	82
	39	78	18	97.69
	40	76	18	98.17	82
	41	75	19	98.07
	42	76	17	95.57	82
	43	78	18	97.14
	44	75	18	94.75	83
	45	75	21	92.7
	46	78	17	93.37	84
	47	78	19	83.67
	48	76	16	96.13	86
	49	78	19	98.61
	50	78	17	94.91	89
	51	75	17	94.36
	52	77	18	94.47	90
	53	80	19	91.45
	54	78	17	82.7	92
	55	77	18	90.7
	56	77	18	83.58	93
	57	78	16	91.78
	58	79	17	67.14	95
	59	78	21	95.13
	60	77	19	93.15	97
	61	76	19	97.18
	62	78	18	95.8	98
	63	79	17	92.82
	64	79	18	93.19	99
	65	78	20	92.15
	66	76	17	89.64	101
	67	77	18	96.66
	68	78	18	98.76	103
	69	77	18	96.84
	70	76	19	98.03	106
	71	76	19	96.49
	72	75	17	95.7	109
	73	74	19	96.61
	74	75	19	96.2	111
	75	80	19	97.16
	76	83	17	89.69	113
	77	82	17	97.45
	78	79	19	92.92	116
	79	80	18	100.7
	80	78	18	90.38	119
	81	81	19	84.8
	82	82	18	85.59	119
	83	79	16	83.36
	84	79	17	95.66	120
	85	78	19	99.74
	86	79	18	99.22	121
	87	79	18	100.58
	88	75	19	97.25	120
	89
	90				120
	Time (min)	HR	RR	SpO2	Glucose
20180102017	1	66	16	83.95	89		67	0
	2	63	15	84.64			66	1
	3	66	17	84.98			63	2
	4	67	18	83.98			66	3
	5	67	17	83.6	88		67	4
	6	67	19	82.2			67	5
	7	69	20	84.05			67	6
	8	68	18	82.25			69	7
	9	68	19	83.73			68	8
	10	69	18	82.99	87		68	9
	11	68	20	84.76	86		69	10
	12	68	19	84.24	86		66	11
	13	69	19	81.17	86		68	12
	14	67	20	82.67	86		68	13
	15	67	19	80.88	86		69	14
	16	68	19	80.22	86		67	15
	17	67	18	79.9	86		67	16
	18	67	17	84.51	86		68	17
	19	66	18	80.95	86		67	18
	20	64	17	81.91	86		67	19
	21						66	20
	22						64	21
	23						67	22
	24						69	23
	25				87
	26
	27
	28
	29
	30	70	20	84.56	86
	31	70	20	93.2
	32	70	22	93.09	85
	33	68	18	92.23
	34	68	17	92.82	84
	35	66	17	92.98
	36	67	17	92.85	84
	37	67	19	91.69
	38	71	20	87.73	84
	39	68	16	94.63
	40	66	16	93.26	84
	41	68	17	92.39
	42	64	15	91.46	84
	43	68	18	94.31
	44	66	16	93.12	84
	45	63	15	93.64
	46	65	16	95.73	85
	47	63	15	95.15
	48	64	16	94.24	87
	49	68	16	95.14
	50	66	17	94.54	89
	51	73	19	94.72
	52	68	19	94.1	95
	53	68	15	96.4
	54	68	19	94.85	102
	55	68	18	93.83
	56	65	16	93.14	105
	57	64	14	91.68
	58	71	21	95.3	107
	59	67	20	84.6
	60	66	20	95.88	110
	61	66	18	94.96
	62	71	20	95.16	112
	63	68	16	93.68
	64	69	19	92.99	114
	65	68	18	92.13
	66	68	20	95.93	114
	67	65	20	92.57
	68	63	17	93.56	116
	69	65	16	91.67
	70	70	19	92.84	118
	71	69	20	93.48
	72	67	18	90.48	119
	73	69	21	91.21
	74	67	18	90.84	120
	75	70	20	92.44
	76	69	21	93.27	120
	77	72	22	90.74
	78	68	19	91.87	119
	79	68	20	92.12
	80	71	19	91.89	119
	81	71	20	90.82
	82	74	21	89.96	120
	83	72	18	91.5
	84	71	19	93.03	118
	85	70	18	91.28
	86	68	22	91.35	117
	87	72	19	91.59
	88	73	20	96.33	116
	89	70	19	97.67
	90				116
	Time (min)	HR	RR	SpO2	Glucose
20180102018	1	55	16	96	95
	2	56	16	95.72
	3	56	16	95.81
	4	55	16	95.93
	5	56	15	96.82	94
	6	56	15	96.86
	7	54	17	95.03
	8	57	17	95.64
	9	59	19	97.62
	10	59	18	97.38	94
	11	57	20	95.36	96
	12	58	17	92.13	96
	13	54	15	98.19	96
	14	56	17	98.4	96
	15	57	16	98.11	96
	16	56	19	97.51	95
	17	56	17	97.54	94
	18	57	18	97.54	94
	19	55	17	97.92	94
	20	57	17	97.96	94
	21
	22
	23
	24
	25				95
	26
	27
	28
	29
	30	60	18	93.08	97
	31	58	20	95.85
	32	59	15	97	93
	33	58	17	97.37
	34	64	19	97.07	93
	35	61	17	96.94
	36	61	17	96.44	94
	37	61	17	97.53
	38	59	17	97.29	97
	39	60	18	97.06
	40	60	17	96.86	99
	41	63	17	96.27
	42	63	19	98.06	102
	43	59	15	97.45
	44	60	16	97.64	106
	45	60	14	97.5
	46	58	15	99.83	110
	47	58	15	96.79
	48	62	18	97	113
	49	60	17	97.08
	50	59	16	97	116
	51	59	17	96.84
	52	60	17	97.88	119
	53	59	18	97.58
	54	62	18	96.98	121
	55	65	18	97.41
	56	60	20	97.06	122
	57	60	18	97.06
	58	58	16	96.2	125
	59	59	18	96.21
	60	60	18	96.48	126
	61	63	19	97.02
	62	64	19	96.69	127
	63	61	20	97.34
	64	59	18	97.3	128
	65	62	20	97.17
	66	67	20	97.38	129
	67	64	17	97
	68	61	19	94.85	130
	69	62	16	97.22
	70	60	18	96.66	130
	71	62	18	96.56
	72	61	19	96.08	132
	73	68	19	97.15
	74	64	19	97.41	131
	75	63	19	97.14
	76	68	19	99.09	131
	77	65	16	98.04
	78	63	17	97.65	131
	79	63	19	98.32
	80	59	18	97.29	131
	81	65	19	97.33
	82	61	19	97.79	130
	83	61	19	97.48
	84	63	18	98.84	130
	85	59	18	98.14
	86	66	17	98.06	130
	87	63	16	98.1
	88	65	21	98.47	130
	89	65	20	99.05
	90	60	19	97.93	130
	Time (min)	HR	RR	SpO2	Glucose
20180102019	1	69	16	87.74	106
	2	69	16	90.33
	3	69	15	89.25
	4	67	17	90.76
	5	70	14	89.53	103
	6	68	14	85.18
	7	68	15	96.15
	8	68	15	96.44
	9	66	17	96.34
	10	67	16	84.64	103
	11	68	17	93.24	103
	12	65	18	96.44	102
	13	66	16	95.7	102
	14	67	15	95.47	101
	15	68	16	96.85	100
	16	69	15	96.09	101
	17	67	15	97.58	101
	18	68	14	94.57	102
	19	67	15	94.83	102
	20	68	16	94.82	102
	21
	22
	23
	24
	25				103
	26
	27
	28
	29
	30	72	17	86.42	103
	31	70	15	93.99
	32	69	16	92.47	104
	33	70	16	92.27
	34	70	17	93.27	103
	35	69	16	92.92
	36	70	17	92.13	102
	37	72	17	91.49
	38	72	18	90.66	102
	39	70	18	93.7
	40	72	18	94.06	102
	41	74	19	93.71
	42	69	16	93.78	102
	43	73	16	92.64
	44	70	17	94.86	103
	45	71	16	92.9
	46	72	16	91.61	105
	47	70	16	91.94
	48	69	15	89.66	106
	49	72	17	88.8
	50	71	16	92.03	107
	51	70	16	90.27
	52	70	16	90.33	108
	53	71	16	90.2
	54	66	17	90.09	109
	55	70	17	91.48
	56	68	15	90.05	112
	57	66	15	92.23
	58	70	16	90.46	114
	59	69	16	93.54
	60	68	15	91.78	115
	61	65	14	92.1
	62	69	17	89.91	116
	63	67	16	92.38
	64	64	17	94.24	117
	65	66	14	89.94
	66	65	17	91.19	119
	67	67	17	85.92
	68	70	17	93.27	120
	69	68	16	94.69
	70	64	17	94.67	122
	71	66	16	95.27
	72	64	17	94.6	123
	73	64	17	94.61
	74	64	15	94.27	124
	75	64	18	97.73
	76	69	16	95.7	125
	77	72	17	96.71
	78	69	15	97.2	126
	79	67	16	97.87
	80	71	16	96.76	126
	81	67	15	95.3
	82	69	15	95.55	128
	83	66	16	95.45
	84	66	16	94.87	128
	85	65	19	93.15
	86	67	14	94.11	131
	87	64	16	91.57
	88	71	17	93	132
	89	71	16	95.1
	90				132
	Time (min)	HR	RR	SpO2	Glucose
20180102020	1	71	16	98.08	91
	2	71	18	98.01
	3	72	16	98.48
	4	69	17	98.79
	5	70	19	98.35	92
	6	75	17	98.37
	7	73	18	98.65
	8	71	18	98.49
	9	70	17	98.44
	10	69	17	98.53	90
	11	66	17	97.36	90
	12	66	20	100.17	91
	13	70	19	99.15	90
	14	70	18	98.52	89
	15	70	19	98.87	89
	16	71	17	98.96	90
	17	68	19	98.46	89
	18	70	18	98.08	88
	19	70	19	98.56	88
	20	71	20	99.14	88
	21
	22
	23
	24
	25				88
	26
	27
	28
	29
	30	75	19	98.91	88
	31	80	17	97.89
	32	80	19	97.48	89
	33	79	17	97.94
	34	79	17	98.54	91
	35	77	18	98.13
	36	80	16	99.09	94
	37	78	20	99.02
	38	79	17	99.05	99
	39	78	17	98.76
	40	79	17	98.71	101
	41	78	17	99.26
	42	78	18	99.44	108
	43	79	19	99.17
	44	78	19	99.54	113
	45	77	17	98.62
	46	81	18	99.61	116
	47	79	18	92.89
	48	79	19	98.75	119
	49	80	19	99.16
	50	81	20	99.01	121
	51	80	17	99.52
	52	84	19	99.26	122
	53	85	19	99.34
	54	85	19	100.05	122
	55	84	17	99.42
	56	83	20	100.76	122
	57	87	18	97.63
	58	87	18	99.33	122
	59	84	18	100.09
	60	84	17	100.09	121
	61	88	18	99.83
	62	88	17	99.82	120
	63	85	18	100.22
	64	83	18	99.73	119
	65	87	17	99.17
	66	87	19	100.46	119
	67	87	16	99.98
	68	87	17	99.55	118
	69	89	19	100.54
	70	90	18	99.25	118
	71	89	17	99.24
	72	88	19	99.89	114
	73	92	18	99.35
	74	92	18	99.81	111
	75	88	18	100.41
	76	88	17	99.39	109
	77	89	18	100.49
	78	91	18	99.55	107
	79	87	16	99.43
	80	88	19	98.69	107
	81	90	18	98.76
	82	90	17	99.29	105
	83	91	17	100.59
	84	89	19	100.28	101
	85	87	19	100.02
	86	91	18	100.18	95
	87	88	18	99.22
	88	90	18	99.28	90
	89	89	18	98.96
	90	89	20	99.21	88
	Time (min)	HR	RR	SpO2	Glucose
20180102021	1	69	17	92.08	69
	2	75	18	92.96
	3	71	19	90.4
	4	68	18	91.04
	5	69	18	89.27	67
	6	73	19	93.05
	7	75	20	91.03
	8	72	18	93.23
	9	74	17	92.36
	10	74	20	93.05	66
	11	69	18	92.11	67
	12	75	19	92.63	67
	13	70	17	91.18	67
	14	74	20	93.16	68
	15	71	17	93.46	68
	16	76	20	91.44	68
	17	71	19	92.64	69
	18	75	20	92.76	70
	19	73	20	90.77	70
	20	72	22	94.6	71
	21
	22
	23
	24
	25				72
	26
	27
	28
	29
	30	72	18	95.01	75
	31	72	18	95.97
	32	69	20	95.6	74
	33	75	19	95.87
	34	75	19	97.38	73
	35	74	20	97.48
	36	71	19	97.59	76
	37	72	19	97.38
	38	72	18	97.33	78
	39	72	19	96.94
	40	75	18	95.98	82
	41	75	20	94.53
	42	78	19	97.03	85
	43	77	17	96.99
	44	76	19	96.29	84
	45	79	18	97.28
	46	73	19	97.23	89
	47	74	20	97.4
	48	74	18	97.01	91
	49	74	20	96.67
	50	72	18	96.71	94
	51	77	19	96.4
	52	77	18	96.22	96
	53	78	18	97.02
	54	76	19	96.43	98
	55	77	17	95.74
	56	76	20	95.52	101
	57	75	15	95.43
	58	75	18	95.28	103
	59	77	20	97.07
	60	78	18	96.66	108
	61	76	18	97.77
	62	79	18	97.6	111
	63	75	20	97.84
	64	75	17	98	113
	65	80	19	97.78
	66	73	20	81.38	113
	67	77	20	96.32
	68	77	18	96.12	113
	69	80	21	98.11
	70	77	19	97.86	114
	71	73	19	97.97
	72	76	20	95.52	119
	73	76	18	95.24
	74	75	19	95.77	120
	75	78	19	95.88
	76	78	18	96.2	120
	77	77	20	96.33
	78	79	19	96.22	119
	79	79	18	96.35
	80	79	17	97.19	117
	81	79	15	96.28
	82	78	18	95.58	116
	83	79	19	96.21
	84	79	18	94.69	115
	85	78	19	95.37
	86	75	16	95.74	115
	87	79	17	96.03
	88	77	17	96.75	116
	89	78	19	94.71
	90				112
	Time (min)	HR	RR	SpO2	Glucose
20180102022	1	60	18	97.65	75
	2	59	20	97.07
	3	61	19	97.61
	4	61	20	97.13
	5	61	19	97.73	73
	6	63	18	96.76
	7	60	19	97.3
	8	60	19	97.34
	9	62	19	97
	10	63	19	97.28	72
	11	60	20	97.11	72
	12	63	21	89.36	72
	13	58	18	99.52	69
	14	60	16	99.15	70
	15	67	17	98.5	72
	16	63	22	98.97	74
	17	61	17	99.22	72
	18	61	18	99.36	72
	19	61	19	99.44	72
	20	60	19	99.34	72
	21
	22
	23
	24
	25				76
	26
	27
	28
	29
	30	68	19	97.57	77
	31	68	18	95.75
	32	69	18	98.03	77
	33	70	22	98.4
	34	70	19	98.19	75
	35	71	18	97.5
	36	70	18	98.23	74
	37	71	18	81.8
	38	67	18	96.67	74
	39	67	19	96.08
	40	67	20	95.93	75
	41	65	17	94.16
	42	65	18	96.33	79
	43	66	18	96.13
	44	66	20	96.91	82
	45	66	16	96.68
[truncated: 312 more rows]
